# Supplementary material
Source: PubMed Central journal article supplement (PMC8594612)
Supplement: iai.00454-21-s0001.pdf [file iai.00454-21-s0001.pdf]

1 **Figure S1. Conserved phenotypes exist among several Tn mutant strains of *A. baumannii*.** A:  
2 Murine, bone marrow-derived macrophages were infected with chemically-killed, mid log-phase *Ab*  
3 17978 VU or one of the Tn mutant strains made in the *Ab* 17978 UN background – Tn5A7, Tn2, or Tn7  
4 – at an MOI of 10. At 18 h.p.i., supernatants were collected from each well, and the concentration of  
5 IL-1 $\beta$  was quantified via ELISA. B: Representative electron microscopy images of *Ab* 17978 VU and  
6 the Tn mutant strains Tn5A7 and Tn20A11. Numerous appendages (pili) are visible on the cell surface  
7 of both Tn mutant strains, but not on the cell surface of *Ab* 17978 VU. C: Quantification of the differences  
8 in cell surface appendages between strains in terms of the number of cells with pili and the average  
9 number of pili per cell. A and C: Columns depict the mean, and error bars show standard deviation of  
10 the mean. All means were compared with the mean of the first column using a one-way ANOVA  
11 adjusted for multiple comparisons. \*: p<0.05; \*\*: p<0.01; \*\*\*: p<0.001.

27 **Figure S2. No differences in blood neutrophil or lymphocyte abundance exist between mice**  
28 **infected with *Ab* 17978 VU and mice infected with *Ab* 17978 UN.** A-D: Mice were challenged  
29 intranasally with  $3 \times 10^8$  CFU of mid log-phase *Ab* 17978 VU or *Ab* 17978 UN. At 24 h.p.i., mice were  
30 euthanized, blood was collected via cardiac puncture, and blood cell counts were determined using an  
31 automated hematology analyzer. Circles represent individual animals, columns depict the mean, and  
32 error bars show standard deviation of the mean. Means were compared using an unpaired Welch's *t*-  
33 test. ns: not significant.

34

35

36

37

38

39

40

41

42

43

44

45

46

47

48

49

50

51

52

53 **Figure S3. Lung and serum levels of IL-1 $\beta$  do not differ between mice infected with Ab 17978 VU**  
54 **and mice infected with Ab 17978 UN at 24 h.p.i.** Mice were challenged intranasally with  $3 \times 10^8$  CFU  
55 of mid log-phase Ab 17978 VU or Ab 17978 UN. At 24 h.p.i., mice were euthanized, blood was collected  
56 via cardiac puncture, and lungs were harvested. IL-1 $\beta$  in the serum (A) or lung homogenates (B) was  
57 quantified using ELISA. A: N=3-5 biological replicates per group, per experiment. Experiments were  
58 repeated for a total of at least two times, with graphs depicting representative data. B: N=3-5 biological  
59 replicates per group, per experiment. Graphs depict average results from at least two independent  
60 experiments. A and B: Columns depict the mean, and error bars show standard deviation of the mean.  
61 Means were compared using an unpaired Welch's *t*-test. ns: not significant.

62

63

64

65

66

67

68

69

70

71

72

73

74

75

76

77

78 **Figure S4. The accessory pilus assembly genes present in *Ab* 17978 UN do not contribute to**  
79 **increased phagocytosis by macrophages, biofilm formation, bacterial surface associated**  
80 **motility, bacterial association with epithelial cells and erythrocytes, or differential production of**  
81 **cytokines by infected macrophages.** A: Macrophage-like RAW 264.7 cells were infected with mid  
82 log-phase *Ab* 17978 VU, *Ab* 17978 UN, or *Ab* 17978 UN  $\Delta$ *pilus* at an MOI of 15. At 1 h.p.i., and  
83 extracellular bacteria were killed with gentamicin at 1 h.p.i. Thirty minutes after the addition of  
84 gentamicin, RAW cells were lysed, and intracellular bacterial burdens were determined. B: Stationary-  
85 phase cultures of *Ab* 17978 VU, *Ab* 17978 UN, and *Ab* 17978 UN  $\Delta$ *pilus* were diluted 1:10 in PBS,  
86 coated onto the wells of a 96-well plate, and incubated at 37 °C without agitation for 24-48 hours. After  
87 incubation, biofilm formation was quantified using crystal violet staining, and the ratio of biofilm to  
88 biomass was determined by measuring the optical densities at 580 nm and 600 nm, respectively. C:  
89 A549 cells were infected with mid log-phase *Ab* 17978 VU, *Ab* 17978 UN, or *Ab* 17978 UN  $\Delta$ *pilus* at an  
90 MOI of 100, and incubated at 37 °C for two hours. At 2 h.p.i., non-adherent bacteria were removed by  
91 washing with PBS, A549 cells were lysed, and the number of cell-associated bacteria was determined.  
92 D: Stationary-phase *Ab* 17978 VU, *Ab* 17978 UN, and *Ab* 17978 UN  $\Delta$ *pilus* were spotted on the surface  
93 of motility agar plates at the center and incubated overnight at 37 °C without agitation. After incubation,  
94 the maximum motility radius was measured. E: *Ab* 17978 VU, *Ab* 17978 UN, and *Ab* 17978 UN  $\Delta$ *pilus*  
95 were grown in static liquid culture (left) or on LBA plates (right), and incubated overnight at 4 °C with  
96 an equal volume of 1% human erythrocytes in PBS. Static liquid cultures of *E. coli* UTI89 and *E. coli*  
97 UTI89  $\Delta$ *fimAH* served as positive and negative controls, respectively. After incubation,  
98 hemagglutination titers (i.e. the maximum dilution at which bacteria are able to agglutinate erythrocytes)  
99 were determined. F and G: Murine, bone marrow-derived macrophages were infected with mid log-  
00 phase cultures of *Ab* 17978 VU, *Ab* 17978 UN, or *Ab* 17978 UN  $\Delta$ *pilus* at an MOI of 10 and incubated  
01 at 37°C. At 18 h.p.i., supernatants of infected BMDMs were collected. The concentrations of IL-10 (A)  
02 and IL-1 $\beta$  (B) in the supernatants of infected BMDMs were determined by ELISA. A–G: N=3-4 biological

03 replicates per group, per experiment. Experiments were repeated for a total of at least two times, with  
04 graphs depicting representative (A, B, E-G) or average (C and D) data. Columns depict the mean, and  
05 error bars show standard deviation of the mean. A-D, F and G: Means were compared to all other  
06 means using a one-way ANOVA adjusted for multiple comparisons. E: Means were compared to the  
07 mean of the first column using a one-way ANOVA adjusted for multiple comparisons. CFU/mL: colony  
08 forming units per milliliter. \*\*:  $p < 0.01$ ; \*\*\*:  $p < 0.001$ ; \*\*\*\*:  $p < 0.0001$ ; ns: not significant.

09

10

11

12

13

14

15

16

17

18

19

20

21

22

23

24

25

26

27

28

29 **Figure S5: The *AbaAL44 katX* gene promotes *Ab 17978 UN* resistance to neutrophil-mediated**  
30 **killing.** Murine, bone marrow-derived neutrophils were incubated with mid log-phase *Ab 17978 VU*, *Ab*  
31 *17978 UN*, or *Ab 17978 UN ΔkatX* at an MOI of 1. Two hours post-incubation, neutrophils were lysed,  
32 and neutrophil-mediated killing of bacteria was assessed by determining the number of viable bacteria  
33 in each well. N=3 per group, per experiment. Experiments were repeated for a total of at least two  
34 times, with graphs depicting representative data. Columns depict the mean, and error bars show  
35 standard deviation of the mean. Means were compared to all other means using a one-way ANOVA  
36 adjusted for multiple comparisons. \*\*: p<0.01; \*\*\*\*: p<0.0001.

55 **Figure S6: Small, punctate colonies are present in supernatants and lysates of macrophage-like**  
56 **RAW 264.7 cells infected with *Ab 17978 UN ΔclsC2* or *Ab 17978 UN ΔclsC2/clsC2*. A-C:**  
57 Macrophage-like RAW 264.7 cells were infected with *Ab 17978 UN*, *Ab 17978 ΔclsC2*, or *Ab 17978*  
58 *ΔclsC2/clsC2* at a target MOI of 15 and starting inoculums were serially diluted in PBS and plated on  
59 LBA (A). B: At 30 minutes post-infection, supernatants were serially diluted in PBS and plated on LBA.  
60 C: The remaining supernatant was aspirated, cells were washed twice with PBS, lysed with 0.01%  
61 Triton X-100, and lysates were serially diluted in PBS and plated on LBA.

62

63

64

65

66

67

68

69

70

71

72

73

74

75

76

77

78

79

80

**Table S1. Bacterial strains and plasmids used in this study**

| Strain/plasmid                                             | Description                                                                                                                                       | Source                 | Reference  |
|------------------------------------------------------------|---------------------------------------------------------------------------------------------------------------------------------------------------|------------------------|------------|
| <i>Ab</i> 17978 VU                                         | Variant of <i>A. baumannii</i> ATCC 17978 that lacks <i>AbaAL44</i> , stored at Vanderbilt University                                             | Vanderbilt University  | ATCC       |
| <i>Ab</i> 17978 UN                                         | Variant of <i>A. baumannii</i> ATCC 17978 that harbors <i>AbaAL44</i> , stored at the University of Nebraska                                      | University of Nebraska | ATCC, (1)  |
| <i>Ab</i> 17978 UN<br>$\Delta$ <i>pilus</i> /pAT02         | <i>Ab</i> 17978 UN with accessory pilus locus ( <i>smf1</i> , <i>yadV</i> , <i>htrE</i> , and <i>mrkD</i> ) replaced by kan <sup>R</sup> cassette |                        | This study |
| <i>Ab</i> 17978 UN<br>$\Delta$ <i>katX</i>                 | <i>Ab</i> 17978 UN with accessory <i>katX</i> gene (KZA74_09300) replaced by kan <sup>R</sup> cassette                                            |                        | This study |
| <i>Ab</i> 17978 UN<br>$\Delta$ <i>katX</i> /EV             | <i>Ab</i> 17978 UN $\Delta$ <i>katX</i> transformed with pWH1266                                                                                  |                        | This study |
| <i>Ab</i> 17978 UN<br>$\Delta$ <i>katX</i> /p <i>katX</i>  | <i>Ab</i> 17978 UN $\Delta$ <i>katX</i> transformed with pWH1266( <i>katX</i> )                                                                   |                        | This study |
| <i>Ab</i> 17978 UN<br>$\Delta$ <i>clsC2</i>                | <i>Ab</i> 17978 UN with accessory cardiolipin synthase gene ( <i>clsC2</i> ) replaced by kan <sup>R</sup> cassette                                |                        | This study |
| <i>Ab</i> 17978 UN<br>$\Delta$ <i>clsC2</i> / <i>clsC2</i> | <i>Ab</i> 17978 UN $\Delta$ <i>clsC2</i> with <i>clsC2</i> reintegrated chromosomally under its native promoter                                   |                        | This study |



|                                       |                                                                                                                  |                                              |        |
|---------------------------------------|------------------------------------------------------------------------------------------------------------------|----------------------------------------------|--------|
| <i>E. coli</i> UTI89                  | Prototypical UPEC strain                                                                                         | Dr. Maria Hadjifrangiskou<br>(Nashville, TN) | (2)    |
| <i>E. coli</i> UTI89<br><i>ΔfimAH</i> | Prototypical UPEC strain with <i>fimA</i> and <i>fimH</i> genes deleted                                          | Dr. Maria Hadjifrangiskou<br>(Nashville, TN) | (3)    |
| <i>E. coli</i><br>100D/pTNS2          | <i>E. coli</i> 100D transformed with helper plasmid encoding the site-specific TnsABCD Tn7 transposition pathway |                                              | (4)    |
| <i>E. coli</i><br>HB101/pRK2013       | <i>E. coli</i> HB101 transformed with oriT helper-containing plasmid                                             |                                              | (4)    |
| <i>E. coli</i> DH5α<br><i>λpir116</i> | Strain that permits maintenance of plasmids at high copy numbers                                                 | Dr. Eric Skaar<br>(Nashville, TN)            |        |
| pCR2.1                                | Vector to amplify kan <sup>R</sup> cassette for insertion                                                        |                                              | (5)    |
| pAT02                                 | precET-carb confers carb/amp resistance and <i>A. baumannii</i> recombinase                                      |                                              | (6)    |
| pWH1266                               | <i>E. coli</i> – <i>A. baumannii</i> shuttle vector conferring ampicillin and tetracycline resistance            |                                              | (7)    |
| pKNOCK-mTn7-amp                       | Plasmid with R6K origin of replication and mini-Tn7 element                                                      |                                              | (4, 8) |

**Table S2. Annotated genes of the accessory cluster present in *Ab* 17978 UN.**

| <b>Gene</b> | <b>Locus Tag<br/>(CP079931)</b> | <b>Annotation</b>                          | <b>Notes</b>                                                                                                              |
|-------------|---------------------------------|--------------------------------------------|---------------------------------------------------------------------------------------------------------------------------|
| 3977*       | KZA74_09200                     | phage/plasmid replication protein          | Identical to 3978, only partially in the island                                                                           |
| 4059*       | KZA74_09205                     | helix-turn-helix transcriptional regulator | Identical to 4060                                                                                                         |
| 3965*       | KZA74_09210                     | putative replication initiation protein    | Identical to 3966                                                                                                         |
| 390*        | KZA74_09215                     | hypothetical protein                       | No putative conserved domains have been detected                                                                          |
| 491*        | KZA74_09220                     | putative Zonular occludens toxin (Zot)     |                                                                                                                           |
| 191*        | KZA74_09225                     | DUF2523 domain-containing protein          |                                                                                                                           |
| 492*        | KZA74_09230                     | hypothetical protein                       | No putative conserved domains have been detected. Truncated relative to Aba810CP_9780 in <i>A. baumannii</i> strain 810CP |
| 493*        | KZA74_09235                     | uncharacterized protein                    | No putative conserved domains have been detected                                                                          |

|                |             |                                            |                                                                                                                                                    |
|----------------|-------------|--------------------------------------------|----------------------------------------------------------------------------------------------------------------------------------------------------|
| 4011*          | KZA74_09240 | hypothetical protein                       | No putative conserved domains have been detected                                                                                                   |
| 3978*          | KZA74_09245 | phage/plasmid replication protein          | Identical to 3977                                                                                                                                  |
| 4060*          | KZA74_09250 | helix-turn-helix transcriptional regulator | Identical to 4059                                                                                                                                  |
| 3966*          | KZA74_09255 | putative replication initiation protein    | Identical to 3965                                                                                                                                  |
| 495*           | KZA74_09260 | hypothetical protein                       | No putative conserved domains have been detected                                                                                                   |
| <i>smf-1_1</i> | KZA74_09265 | Major fimbrial subunit SMF-1               |                                                                                                                                                    |
| <i>yadV_1</i>  | KZA74_09270 | putative fimbrial chaperone YadV           |                                                                                                                                                    |
| <i>htrE_1</i>  | KZA74_09275 | Outer membrane usher protein HtrE          |                                                                                                                                                    |
| <i>mrkD_1</i>  | KZA74_09280 | Fimbria adhesin protein                    |                                                                                                                                                    |
| 501*           | KZA74_09285 | DUF 4882 superfamily protein               | This small family consists of several uncharacterized proteins around 325 residues in length and is mainly found in various Acinetobacter species. |

|              |             |                                                    |                                                  |
|--------------|-------------|----------------------------------------------------|--------------------------------------------------|
|              |             |                                                    | The function of this family is unknown.          |
| <i>frmA</i>  | KZA74_09290 | S-(hydroxymethyl)glutathione dehydrogenase         |                                                  |
| 193*         | KZA74_09295 | phage capsid protein                               |                                                  |
| 503*         | KZA74_09300 | catalase                                           |                                                  |
| 504*         | KZA74_09305 | hypothetical protein                               | No putative conserved domains have been detected |
| 505*         | KZA74_09310 | hypothetical protein                               | No putative conserved domains have been detected |
| <i>clsC2</i> | KZA74_09315 | Cardiolipin synthase C                             |                                                  |
| 506*         | KZA74_09320 | Uracil-DNA glycosylase                             |                                                  |
| 507*         | KZA74_09325 | hypothetical protein                               | No putative conserved domains have been detected |
| 509*         | KZA74_09330 | peptidase                                          |                                                  |
| <i>pqqE</i>  | KZA74_09335 | Pyrroloquinoline quinone biosynthesis protein PqqE |                                                  |
| <i>pqqD</i>  | KZA74_09340 | Coenzyme PQQ synthesis protein D                   |                                                  |
| <i>pqqC</i>  | KZA74_09345 | Pyrroloquinoline-quinone synthase                  |                                                  |

|               |             |                                                     |  |
|---------------|-------------|-----------------------------------------------------|--|
| <i>pqqB</i>   | KZA74_09350 | Coenzyme PQQ synthesis protein B                    |  |
| <i>pqqA</i>   | KZA74_09355 | pyrroloquinoline quinone precursor peptide PqqA     |  |
| <i>ppk_1</i>  | KZA74_09360 | Polyphosphate kinase                                |  |
| <i>yhcR</i>   | KZA74_09365 | Endonuclease YhcR                                   |  |
| 516*          | KZA74_09370 | Fur family transcriptional regulator                |  |
| <i>vibB</i>   | KZA74_09375 | Vibriobactin-specific isochorismatase               |  |
| <i>dhbA</i>   | KZA74_09380 | 2,3-dihydro-2,3-dihydroxybenzoate dehydrogenase     |  |
| <i>cysA_2</i> | KZA74_09385 | Sulfate/thiosulfate import ATP-binding protein CysA |  |
| <i>modB</i>   | KZA74_09390 | Molybdenum transport system permease protein ModB   |  |
| <i>modA</i>   | KZA74_09395 | Molybdate-binding protein ModA                      |  |
| <i>mopA</i>   | KZA74_09400 | Molybdenum-pterin-binding protein MopA              |  |
| <i>antA_2</i> | KZA74_09405 | Anthranilate 1,2-dioxygenase large subunit          |  |

|             |             |                                                                |                      |
|-------------|-------------|----------------------------------------------------------------|----------------------|
| <i>antB</i> | KZA74_09410 | Anthranilate 1,2-dioxygenase<br>small subunit                  |                      |
| <i>antC</i> | KZA74_09415 | anthranilate 1,2-dioxygenase<br>electron transfer<br>component | Partially in AbaLA44 |

86 \*: Indicates name assigned by genome analysis software PROKKA

87

88

89

90

91

92

**Table S3: Predicted mutations in *Ab* 17978 UN.**

| <b>Nucleotide Position<br/>(CP012004 [VU]/<br/>CP079931 [UN])</b> | <b>Allele in VU<br/>(residue)</b> | <b>Allele in UN<br/>(residue)</b> | <b>Gene</b>                                                | <b>Description</b>                         |
|-------------------------------------------------------------------|-----------------------------------|-----------------------------------|------------------------------------------------------------|--------------------------------------------|
| 129,758                                                           | IS <i>Aba18</i>                   | Δ1,312 bp                         | <i>ACX60_00590-ACX60_00595</i>                             | transposase, transposase                   |
| 207,638/206,237                                                   | G (A382)                          | A (T382)                          | <i>actP</i>                                                | acetate permease                           |
| 524,616/ 523,217                                                  | +A                                | Δ1 bp                             | <i>ACX60_02575/KZA74_02575</i>                             | Phosphohydrolase/pseudogene                |
| 807,273/805,874                                                   | G (P439)                          | A (P439)                          | <i>cysG</i>                                                | sirohdrochlorin ferrochelataase            |
| 1,075,443/1,074,044                                               | A (N258)                          | T (I258)                          | <i>ACX60_05080/cgtA</i>                                    | GTPase <i>obgE</i>                         |
| 1,226,257/1,224,858                                               | G (G12)                           | A (D12)                           | <i>ACX60_05695/KZA74_05725</i>                             | membrane protein DUF817                    |
| 1,685,154/1,683,755                                               | T (M78)                           | C (T78)                           | <i>ACX60_07925/uppS</i>                                    | UDP diphosphate synthase                   |
| 2,068,076/2,111,105                                               | T (stop codon)                    | A (L376)                          | Intergenic <i>ACX60_09755-<br/>ACX60_09765/KZA74_10025</i> | SurA N-terminal domain-containing protein  |
| 2,109,791/2,152,820                                               | C (A55)                           | T (T55)                           | <i>ACX60_09960/KZA74_10230</i>                             | hypothetical protein/ putative transporter |
| 2,135,294/2,178,324                                               | +C                                | (C) <sub>5→4</sub>                | <i>ACX60_10130/KZA74_10405</i>                             | DNA helicase AAA family ATPase             |
| 2,172,876/2,215,906                                               | T (F799)                          | G (V799)                          | <i>ACX60_10365/KZA74_10630</i>                             | LPS biosynthesis protein LptD              |

|                     |                         |                         |                                                        |                                                                                       |
|---------------------|-------------------------|-------------------------|--------------------------------------------------------|---------------------------------------------------------------------------------------|
| 2,189,235/2,232,265 | A                       | G                       | <i>ACX60_10450-ACX60_10455/KZA74_10715-putP</i>        | Intergenic (NAD-dependent deacetylase/proline:sodium symporter PutP)                  |
| 2,236,009/2,279,039 | G                       | A                       | <i>ACX60_10685-ACX60_10690/KZA74_10950-KZA74_10955</i> | Intergenic (ABC transporter substrate-binding protein/glutathione S-transferase)      |
| 2,410,784/2,453,814 | C (T2)                  | A (K2)                  | <i>ACX60_11495/KZA74_11775</i>                         | aspartate:proton symporter APC family permease                                        |
| 2,846,783/2,889,821 | Δ1,106 bp               | IS <i>Aba11</i>         | <i>ACX60_17045/KZA74_13815</i>                         | transposase                                                                           |
| 3,384,892/3,429,018 | Δ1 bp                   | +T                      | <i>ACX60_15995-ACX60_16000/KZA74_16315 -infA</i>       | Intergenic (AraC family transcriptional regulator/translation initiation factor IF-1) |
| 3,384,893/3,429,019 | G                       | A                       | <i>ACX60_15995-ACX60_16000/KZA74_16315 -infA</i>       | Intergenic (AraC family transcriptional regulator/translation initiation factor IF-1) |
| 3,852,237           | (ATGGTG) <sub>9→8</sub> | (ATGGTG) <sub>9→8</sub> | <i>ACX60_18165/dmeF</i>                                | cobalt transporter                                                                    |

94

95

96

97



98 **REFERENCES (SUPPLEMENT)**

- 99 1. Jacobs AC, Hood I, Boyd KL, Olson PD, Morrison JM, Carson S, Sayood K, Iwen PC, Skaar  
00 EP, Dunman PM. 2010. Inactivation of phospholipase D diminishes *Acinetobacter baumannii*  
01 pathogenesis. *Infect Immun* 78:1952-62.
- 02 2. Mulvey MA, Schilling JD, Hultgren SJ. 2001. Establishment of a persistent *Escherichia coli*  
03 reservoir during the acute phase of a bladder infection. *Infect Immun* 69:4572-9.
- 04 3. Rosen DA, Pinkner JS, Jones JM, Walker JN, Clegg S, Hultgren SJ. 2008. Utilization of an  
05 intracellular bacterial community pathway in *Klebsiella pneumoniae* urinary tract infection and  
06 the effects of FimK on type 1 pilus expression. *Infect Immun* 76:3337-45.
- 07 4. Kumar A, Dalton C, Cortez-Cordova J, Schweizer HP. 2010. Mini-Tn7 vectors as genetic tools  
08 for single copy gene cloning in *Acinetobacter baumannii*. *J Microbiol Methods* 82:296-300.
- 09 5. Spiliotis M. 2012. Inverse fusion PCR cloning. *PLoS One* 7:e35407.
- 10 6. Tucker AT, Nowicki EM, Boll JM, Knauf GA, Burdis NC, Trent MS, Davies BW. 2014. Defining  
11 gene-phenotype relationships in *Acinetobacter baumannii* through one-step chromosomal  
12 gene inactivation. *MBio* 5:e01313-14.
- 13 7. Hunger M, Schmucker R, Kishan V, Hillen W. 1990. Analysis and nucleotide sequence of an  
14 origin of DNA replication in *Acinetobacter calcoaceticus* and its use for *Escherichia coli* shuttle  
15 plasmids. *Gene* 87:45-51.
- 16 8. Carruthers MD, Nicholson PA, Tracy EN, Munson RS. 2013. *Acinetobacter baumannii* utilizes  
17 a type VI secretion system for bacterial competition. *PLoS One* 8:e59388.
